# Supplementary material
Source: publisher figshare collection journal article supplement (https://tandf.figshare.com/ndownloader/files/21115629)

**Supplementary Material**

New stable phosphorus ylide (*p*-tolyl)3P=CHCOC6H4(*p*-CN) and its metal complexes: Crystal and molecular structure, theoretical study and antibacterial investigation

LEILA VATANNAVAZ, SEYYED JAVAD SABOUNCHEI*, ASIEH SEDGHI, MEHDI BAYAT, KRISTOF VAN HECKE and ABDOLKARIM CHEHREGANI RAD

The 13C NMR spectrum synthesis of phosphonium salt (p-tolyl)3PCH2COC6H4 (p-CN) (**1**)


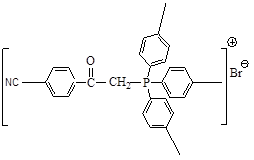

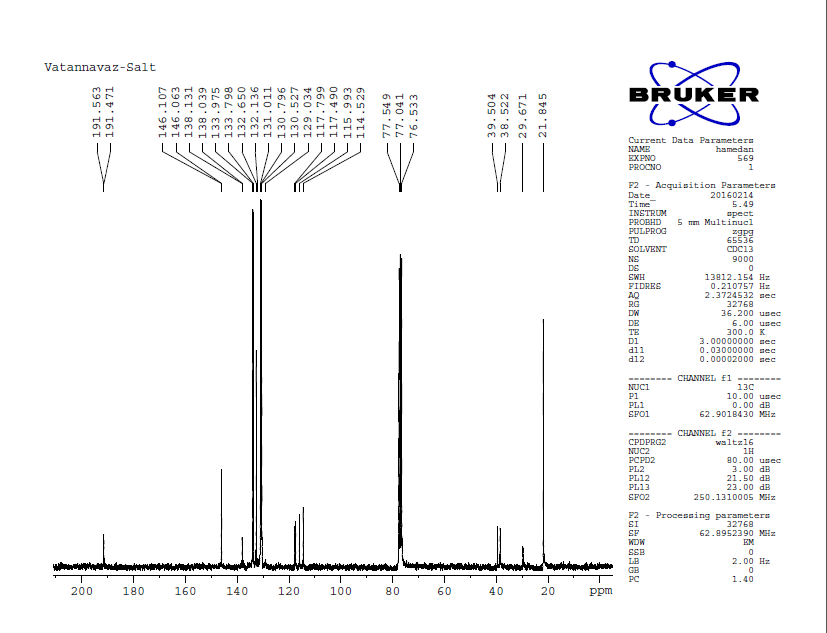


The 1H NMR spectrum synthesis of phosphonium salt (p-tolyl)3PCH2COC6H4 (p-CN) (**1**)


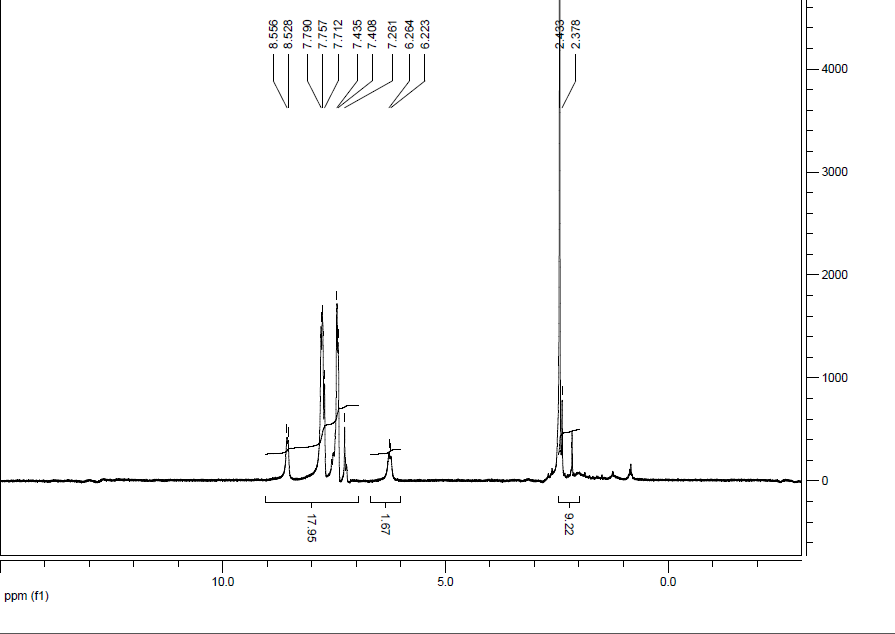


The 31P NMR spectrum synthesis of phosphorus ylide (p-tolyl)3P=CHCOC6H4(p-CN)(Y)(**2**)


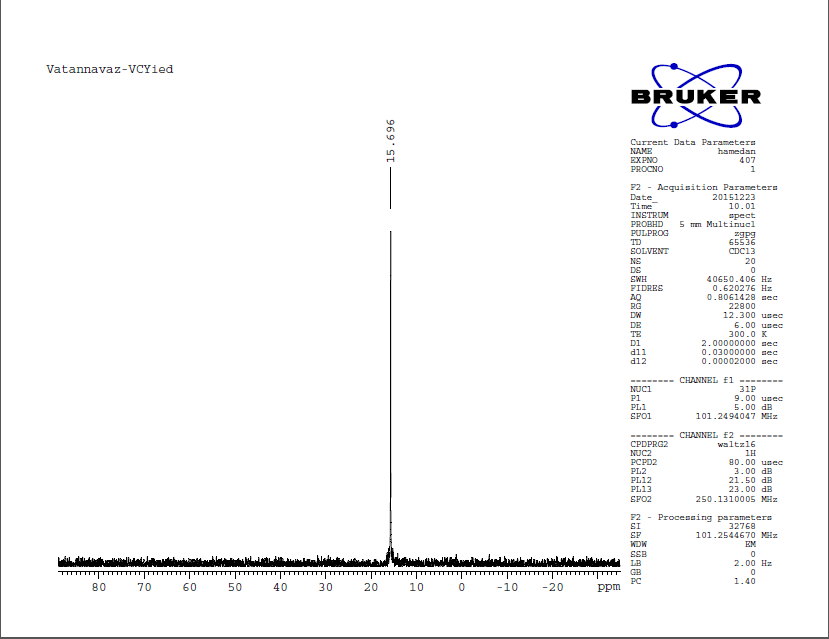


The 13C NMR spectrum synthesis of phosphorus ylide (p-tolyl)3P=CHCOC6H4(p-CN) (Y)(**2**)


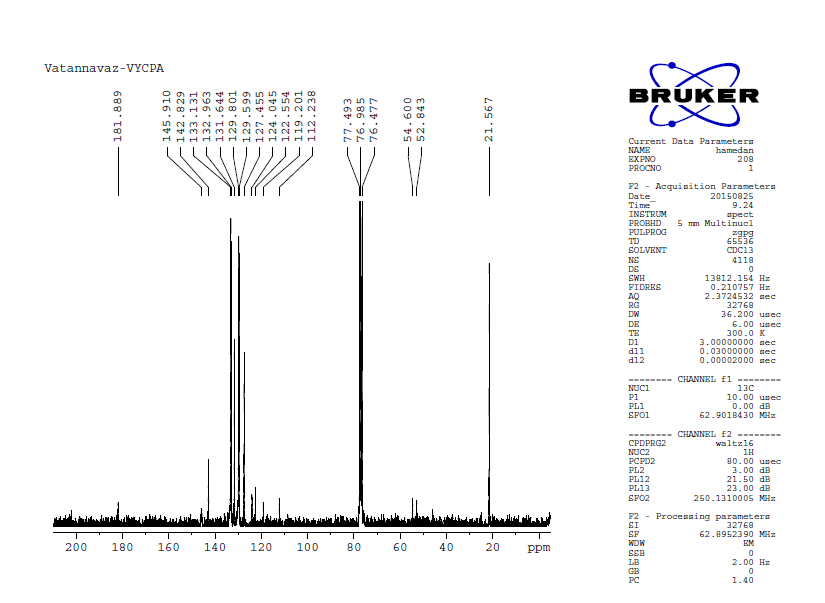


The 1H NMR spectrum synthesis of phosphorus ylide (p-tolyl)3P=CHCOC6H4(p-CN)(Y)(**2**)


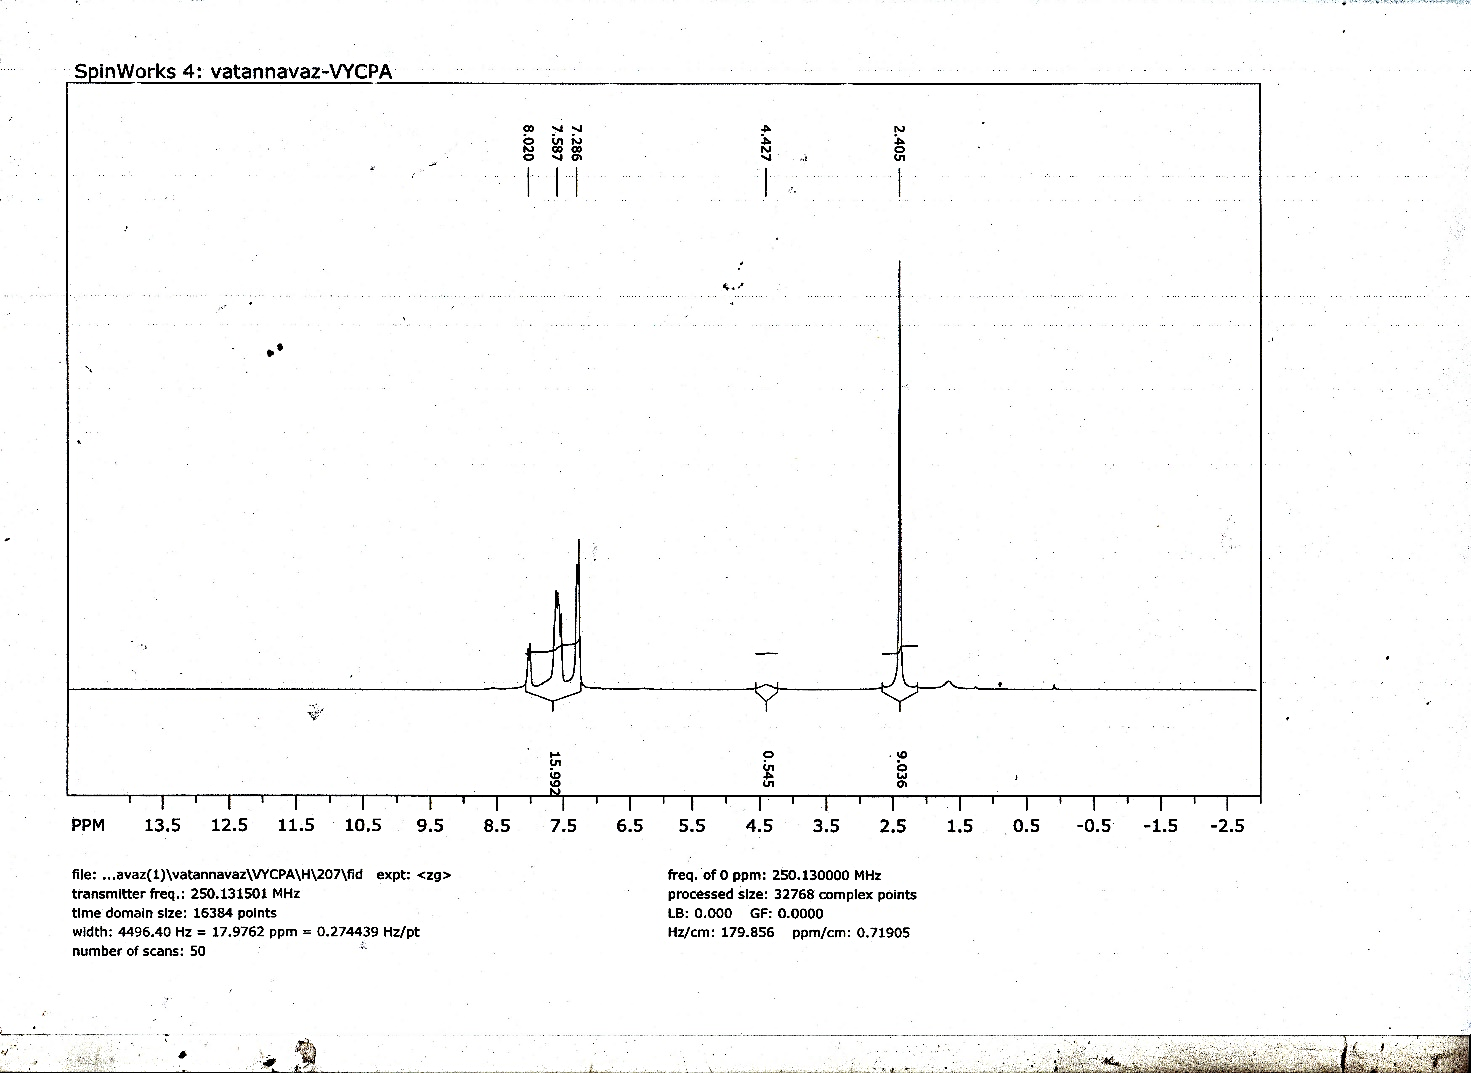


The 31P NMR spectrum synthesis of phosphorus [Y→HgCl2]2 (**3**)

**
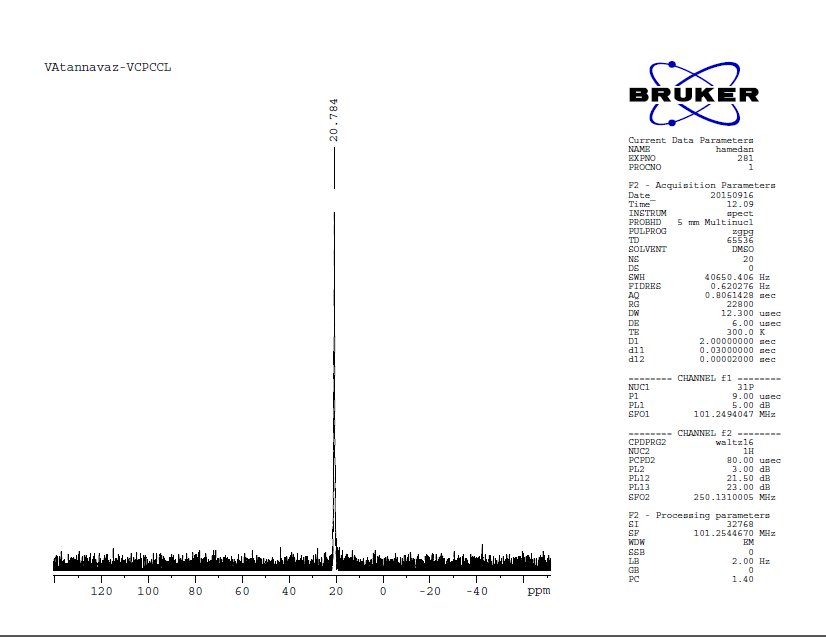
**

The 13C NMR spectrum synthesis of phosphorus [Y→HgCl2]2 (**3**)


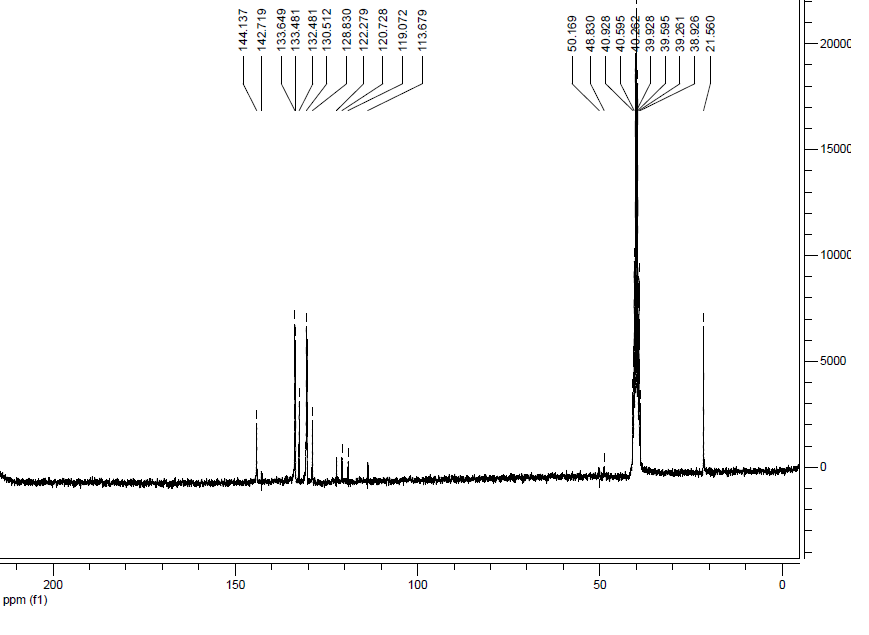


The 1H NMR spectrum synthesis of phosphorus [Y→HgCl2]2 (**3**)


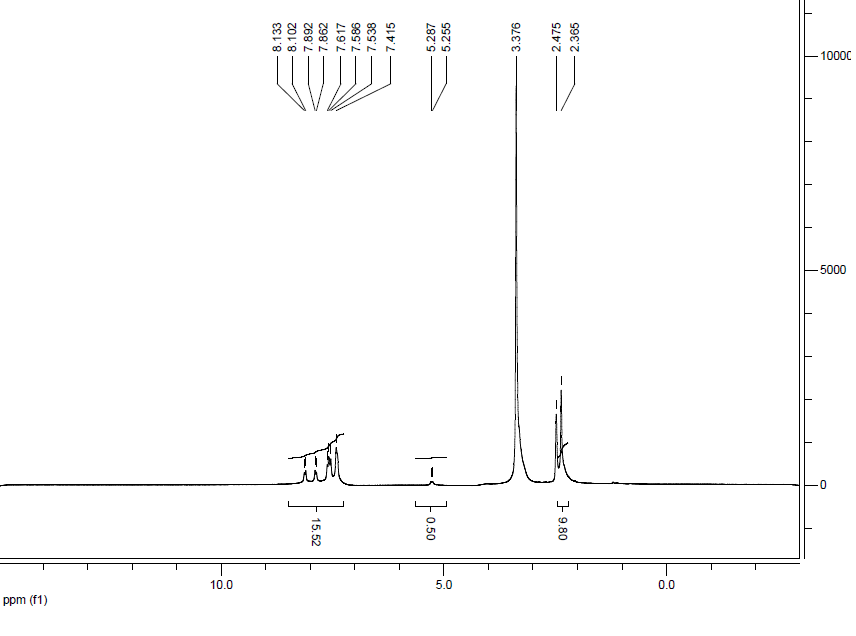


TheIR spectrum synthesis of phosphorus [Y→HgBr2]2 (**4**)


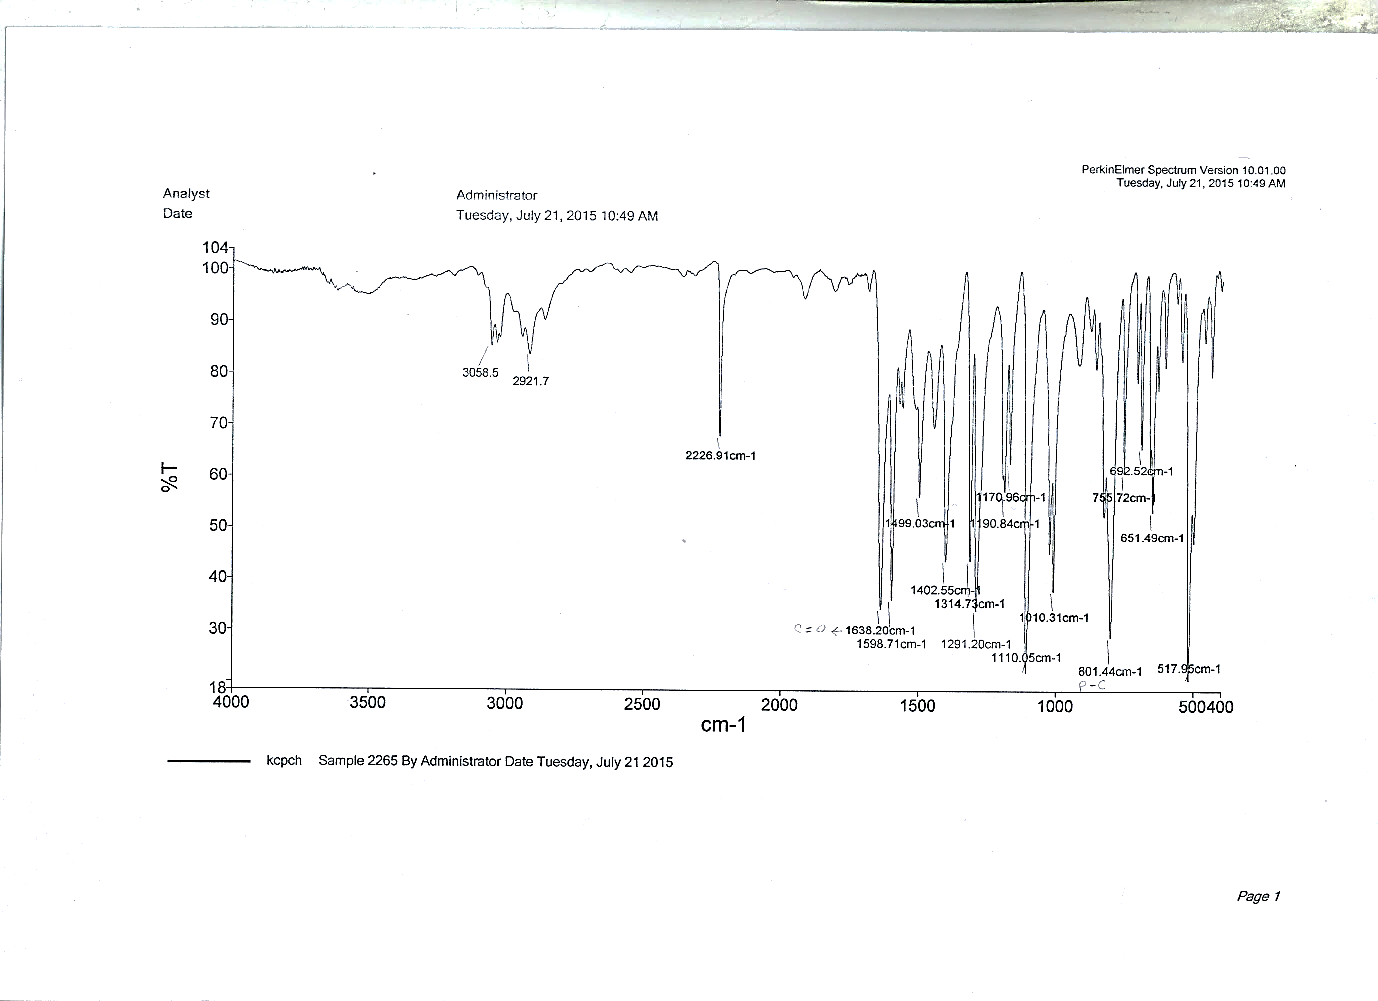


The 31P NMR spectrum synthesis **of phosphorus [Y→**HgBr2]2 (**4**)


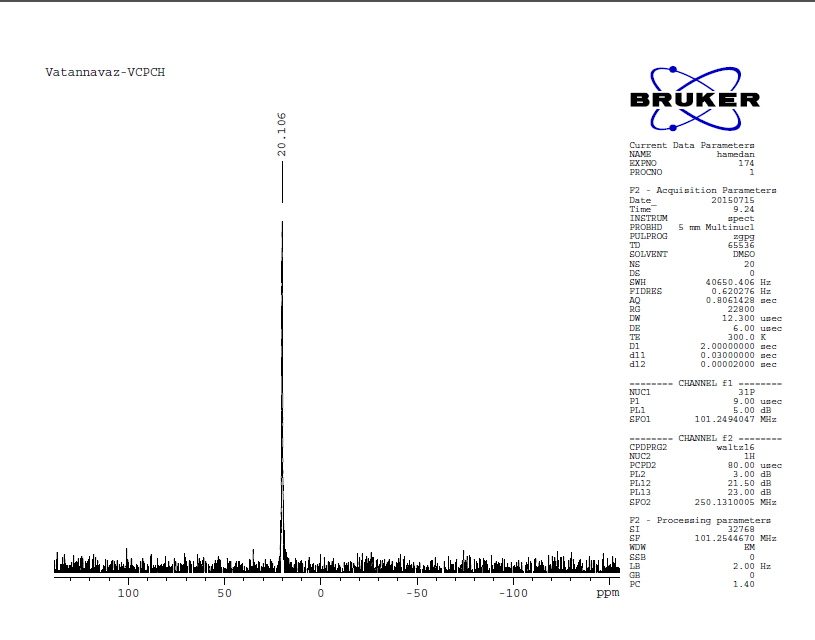


The 13C NMR spectrum synthesis of phosphorus [Y→HgBr2]2 (**4**)


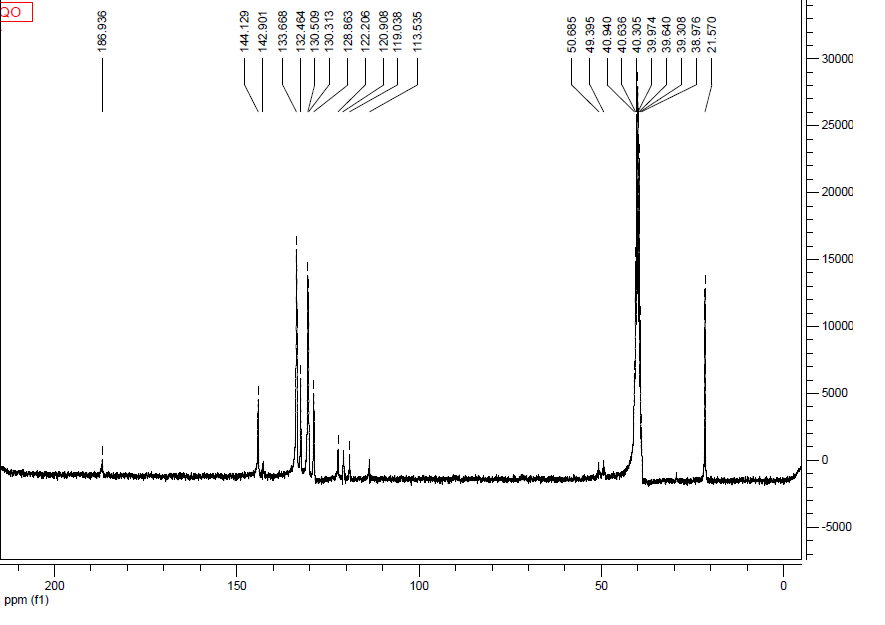


The 1H NMR spectrum synthesis of phosphorus [Y→HgBr2]2 (**4**)


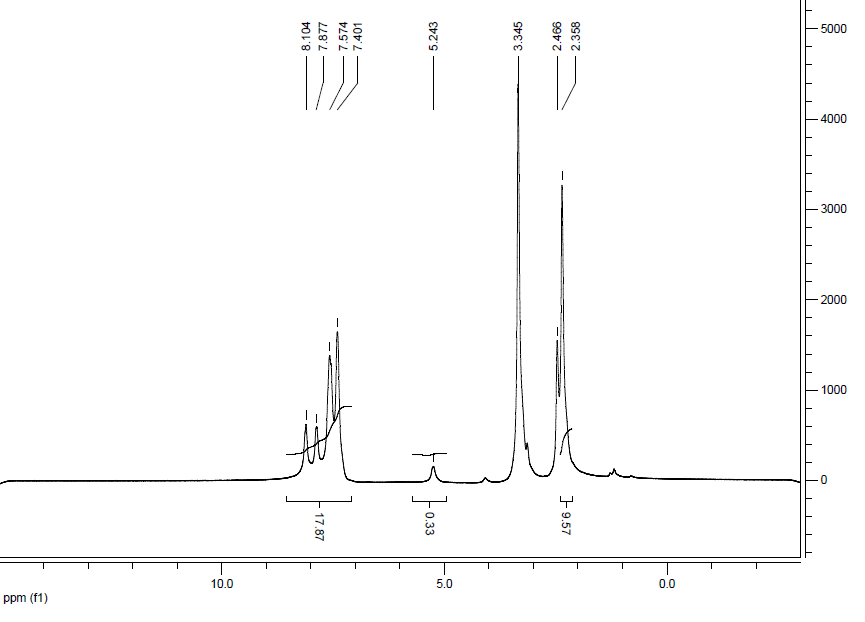


TheIR spectrum synthesis of phosphorus [Y→HgI2]2 (**5**)


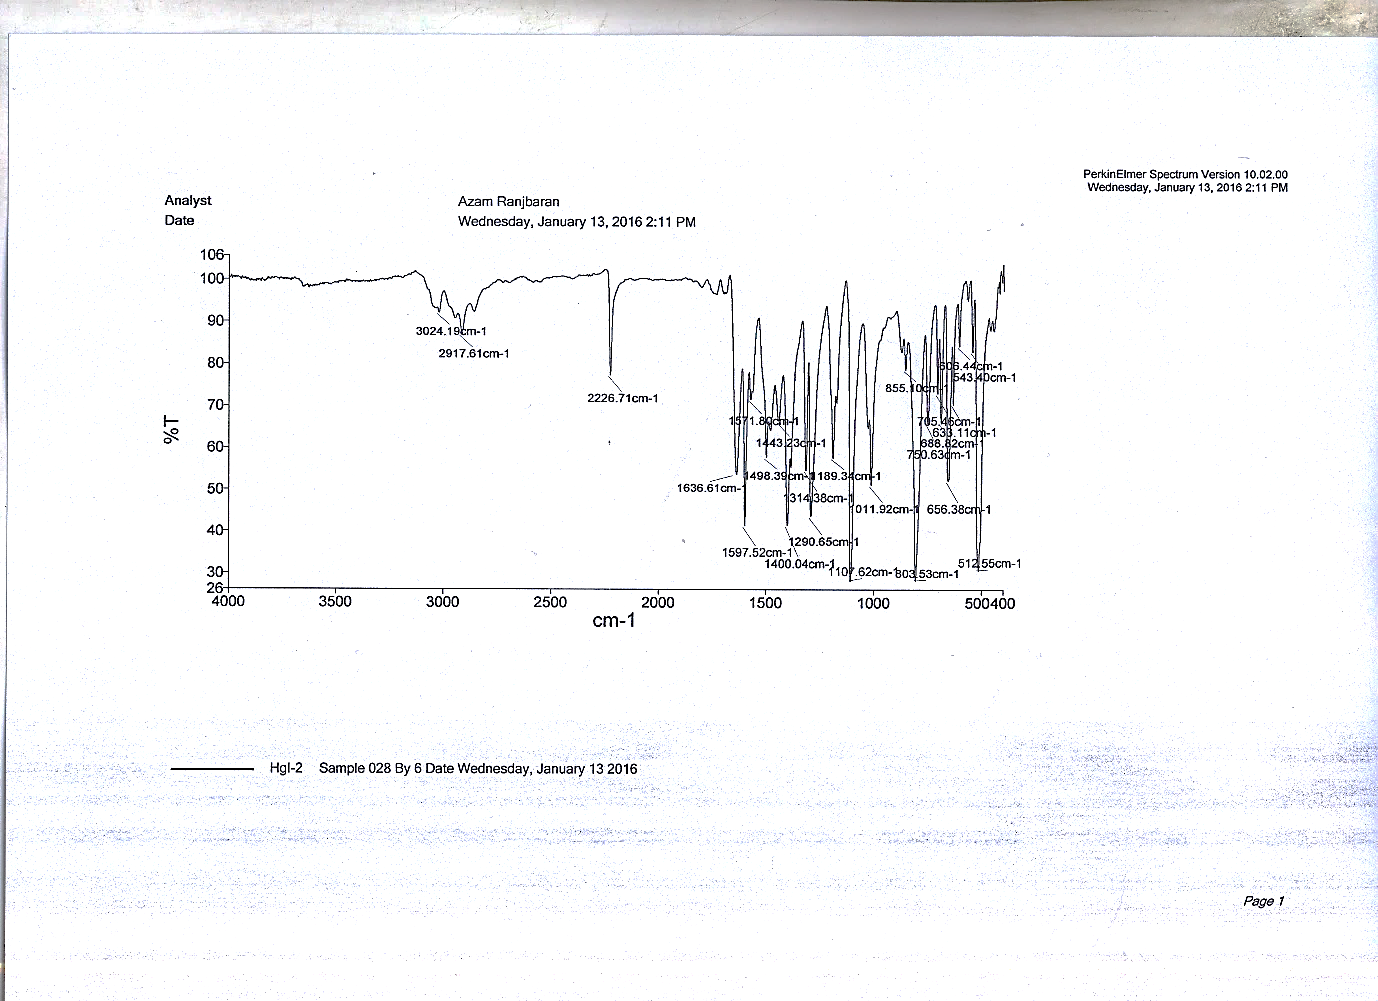


The 31P NMR spectrum synthesis of phosphorus [Y→HgI2]2 (**5**)


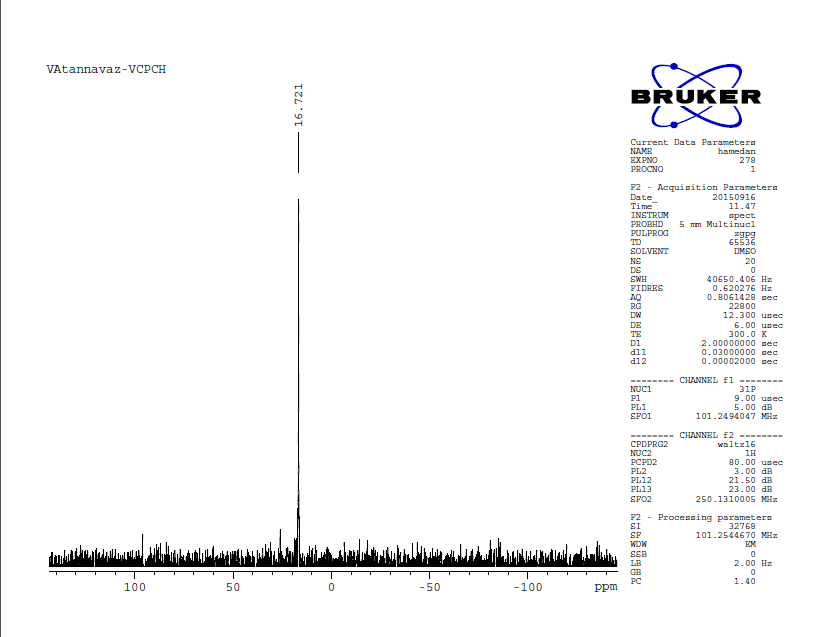


The 13C NMR spectrum synthesis of phosphorus [Y→HgI2]2 (**5**)


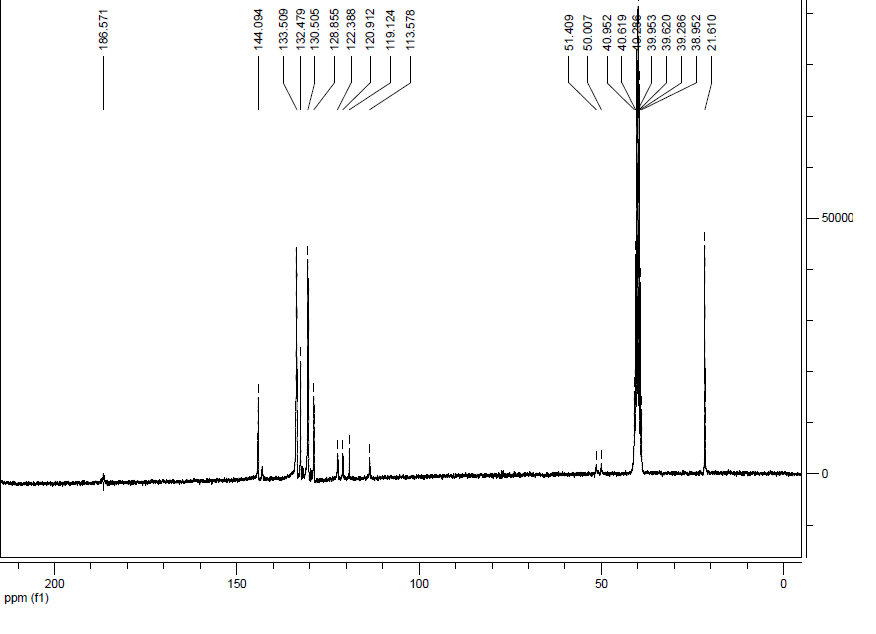


The 1H NMR spectrum synthesis of phosphorus [Y→HgI2]2 (**5**)


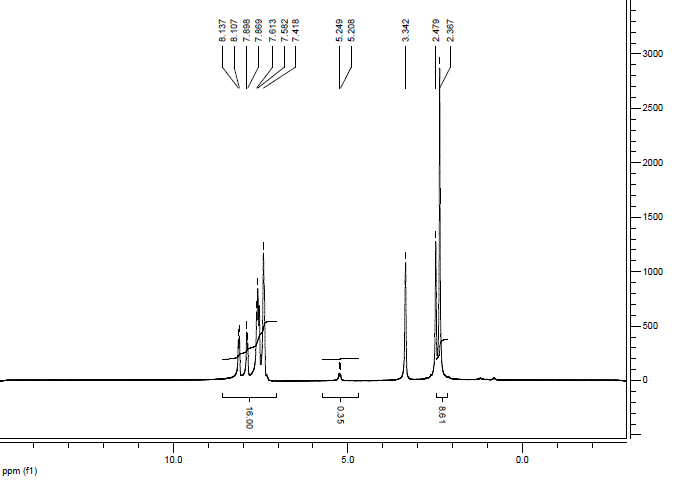


TheIR spectrum synthesis of phosphorus [Y→Cd(NO3)]2 (**6**)


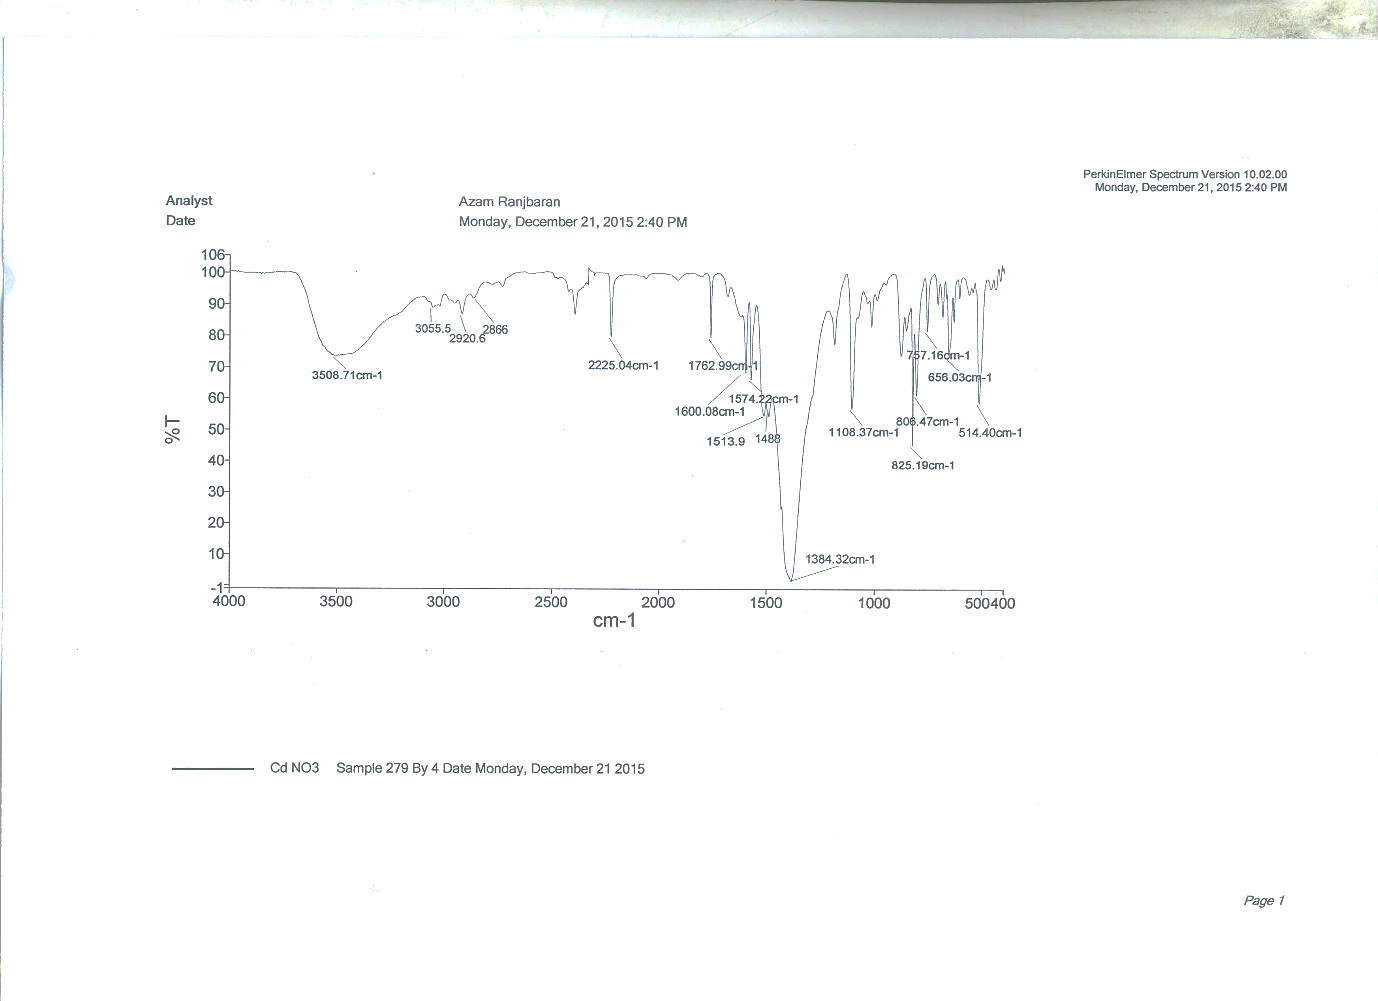


The 31P NMR spectrum synthesis of phosphorus [Y→Cd(NO3)]2 (**6**)


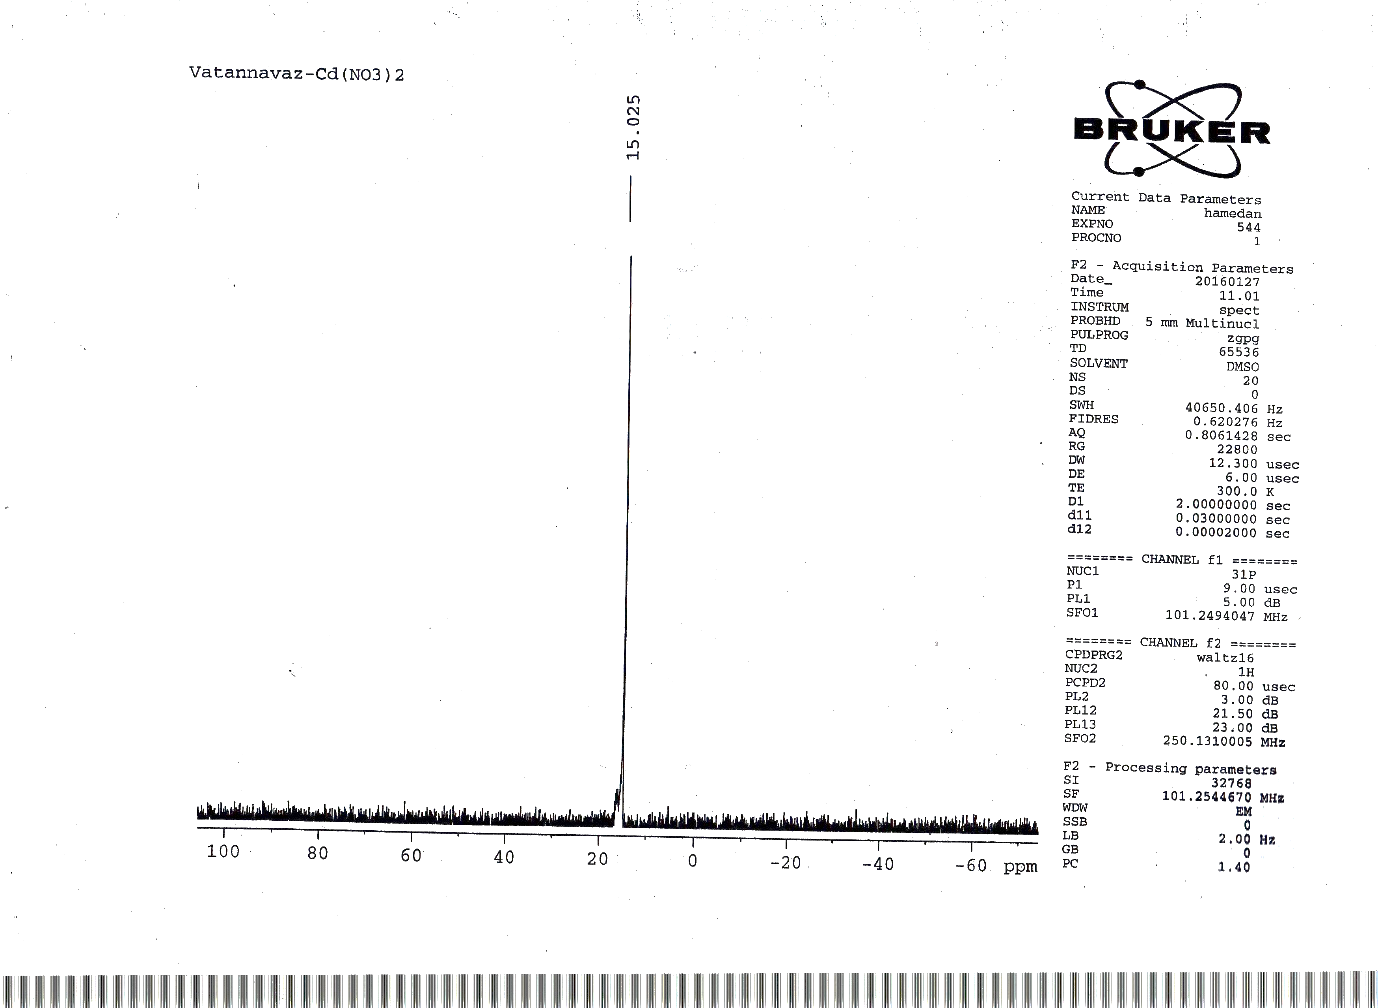


The 13C NMR spectrum synthesis of phosphorus [Y→Cd(NO3)]2 (**6**)


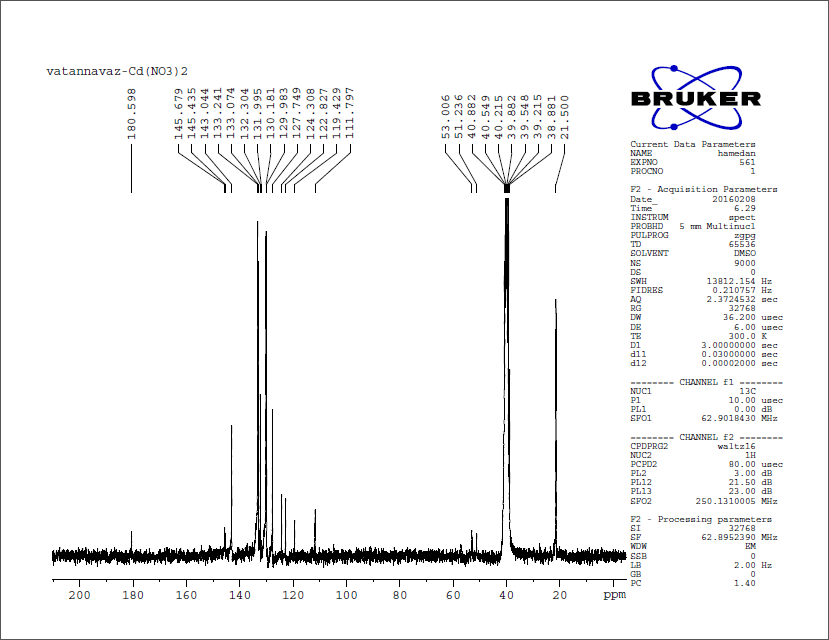


The 1H NMR spectrum synthesis of phosphorus [Y→Cd(NO3)]2 (**6**)


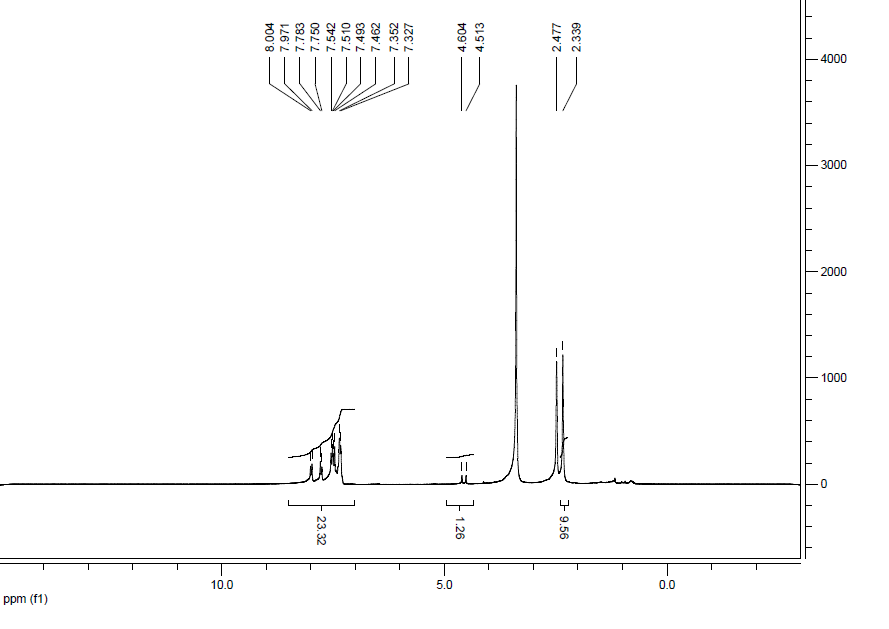

Supplement: Supplementary file 1 [file 21115629]
